# Supplementary material for: Adaptive artificial evolution of droplet protocells in a 3D-printed fluidic chemorobotic platform with configurable environments
Source: PubMed Central journal article supplement (PMC5658334; doi:10.1038/s41467-017-01161-8), 2017-10-26
Supplement: 41467_2017_1161_MOESM3_ESM.pdf [file 41467_2017_1161_MOESM3_ESM.pdf]

## **Description of Additional Supplementary Files**

File Name: Supplementary Movie 1

Description: Shows a trailer of the working platform.

File Name: Supplementary Movie 2

Description: Shows a video of how the droplet recipes evolve through a genetic algorithm.

File Name: Supplementary Movie 3

Description: Shows how the evolutionary fitness landscape evolves through a genetic algorithm.
